# Supplementary material
Source: Royal Society of Chemistry journal article supplement (doi:10.1039/d6nr01383j)
Supplement: d6nr01383j1.pdf [file d6nr01383j1.pdf]

## Supporting Information

### Interface-Engineered ZnS QDs@HKUST-1 Composite for Electrochemical Overall Water Splitting

Ayushi Srivastava, Harsh Dadhania, Kevin Vachhani and Abhishek Dadhania\*

*Department of Chemical Sciences, P D Patel Institute of Applied Sciences, Charotar University of Science and Technology, Changa - 388421, Gujarat, INDIA.*

\*Corresponding Author: [abhishekdadhania.bt@charusat.ac.in](mailto:abhishekdadhania.bt@charusat.ac.in)

#### List of Contents

|            |                                                                                                                                    |    |
|------------|------------------------------------------------------------------------------------------------------------------------------------|----|
| Figure S1  | FESEM-EDS image of ZQH-1                                                                                                           | S2 |
| Table S1   | ICP-OES elemental analysis of ZQH-1                                                                                                | S2 |
| Figure S2  | N <sub>2</sub> adsorption-desorption isotherms of ZQH-1 and HKUST-1                                                                | S3 |
| Figure S3  | Raman spectra of HKUST-1, ZnS QDs and ZQH-1 (a) Before (b) After stability                                                         | S4 |
| Figure S4  | High resolution XPS spectra of (b) Zn 2p, (c) S 2p, (d) C 1s (e) Cu 2p and (f) O 1s of ZQH-1 composite post stability.             | S4 |
| Figure S5  | CV curves of (a) HKUST-1 (b) ZnS QDs (c) ZQH-1                                                                                     | S5 |
| Figure S6  | Equivalent circuit representation obtained from Nyquist plot fitting for ZQH-1                                                     | S5 |
| Figure S7  | PXRD patterns of (a) ZQH-1, (b) HKUST-1, and (c) ZnS QDs before and after post-stability.                                          | S5 |
| Figure S8  | LSV curve of ZQH-1 composite before and after 36h of stability.                                                                    | S6 |
| Figure S9  | LSV curve (non-iR-corrected) of ZQH-1 composite (a) HER and (b) OER.                                                               | S6 |
| Figure S10 | SEM images of synthesized materials before and after stability.                                                                    | S7 |
| Table S2   | Comparison with similar MOF/QDs composites, high-performance non-precious metal catalysts, and commercial precious metal catalysts | S7 |
| Table S3   | Comparison of the electrochemical performance of the previously reported materials.                                                | S8 |

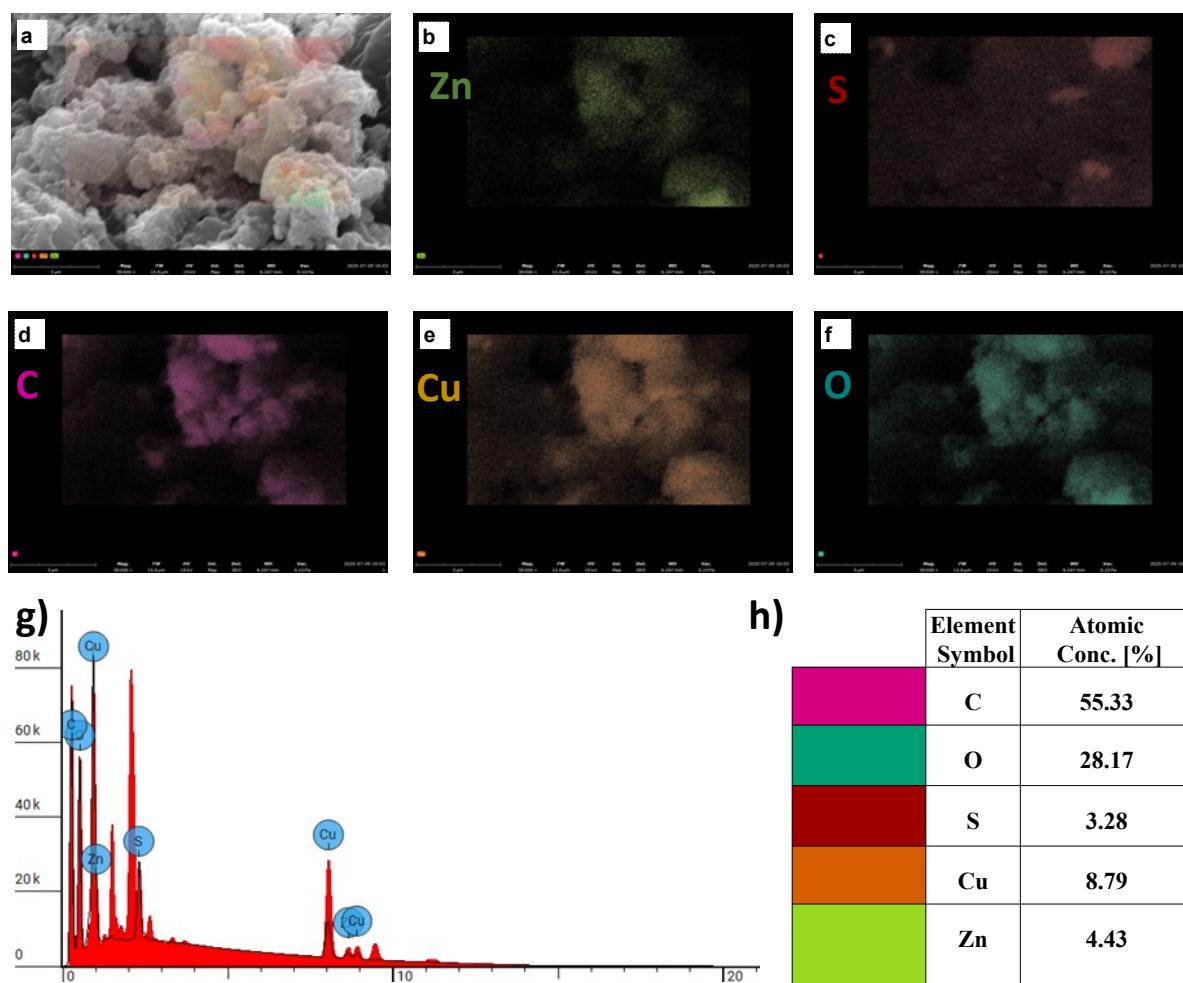

**Fig. 1** (a) FESEM-EDS image of ZQH-1 (b-f) displays the elemental mapping images of distribution of Zn, S, C, Cu, O respectively, (g) Energy dispersive spectrum of ZQH-1, (h) the EDS spectrum showing the percentage of chemical elements present.

**Table S1:** ICP-OES elemental analysis of ZQH-1 showing the concentration of key elements (in ppm).

| Element | ZQH-1      |
|---------|------------|
| Mn      | 0.001 ppm  |
| Ba      | 0.009 ppm  |
| B       | 0.011 ppm  |
| Co      | 0.001 ppm  |
| Cu      | 39.743 ppm |

|    |            |
|----|------------|
| Pb | 0.041 ppm  |
| Mn | 0.001 ppm  |
| Ni | 0.006 ppm  |
| Zn | 20.663 ppm |

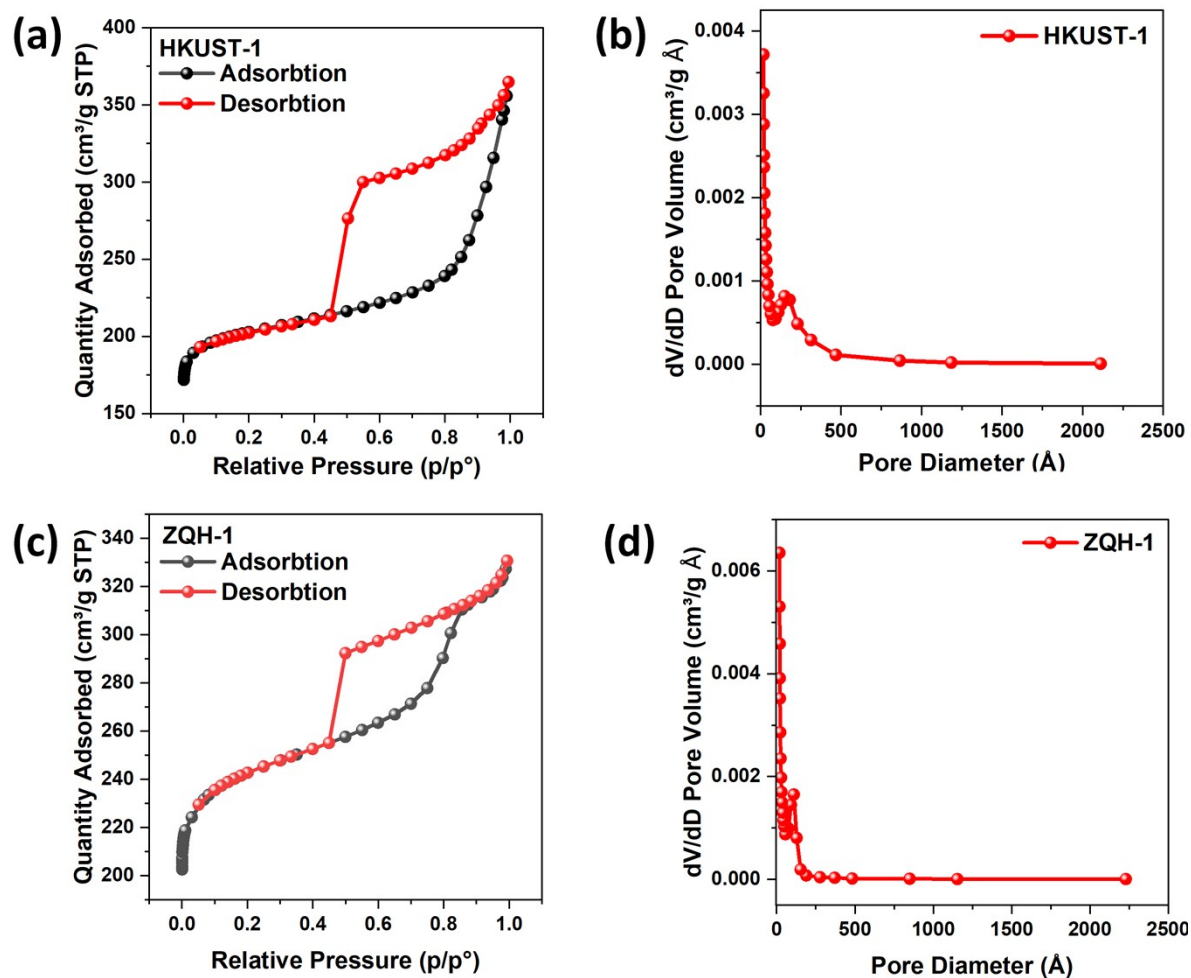

**Fig. 2** N<sub>2</sub> adsorption-desorption isotherms with the corresponding BJH pore size distributions for (a-b) HKUST-1 and (c-d) ZQH-1.

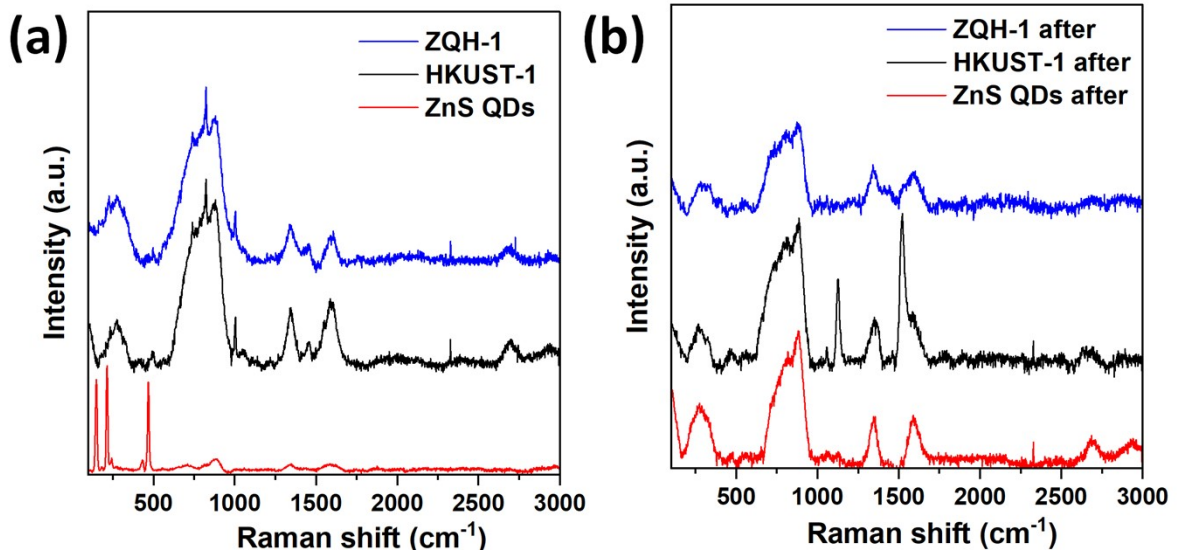

**Fig. 3** Raman spectra of HKUST-1, ZnS QDs and ZQH-1 (a) Before (b) After stability.

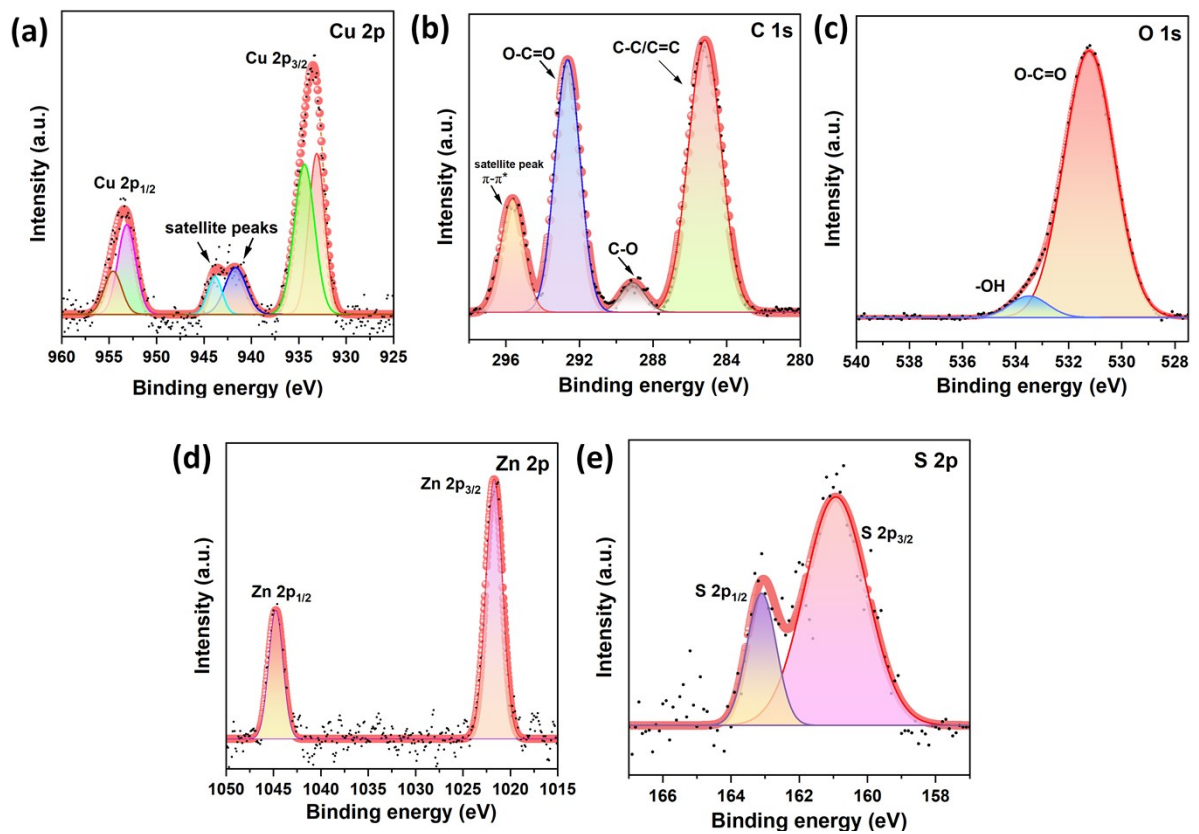

**Fig. 4** High resolution XPS spectra of (b) Zn 2p, (c) S 2p, (d) C 1s (e) Cu 2p and (f) O 1s of ZQH-1 composite post stability.

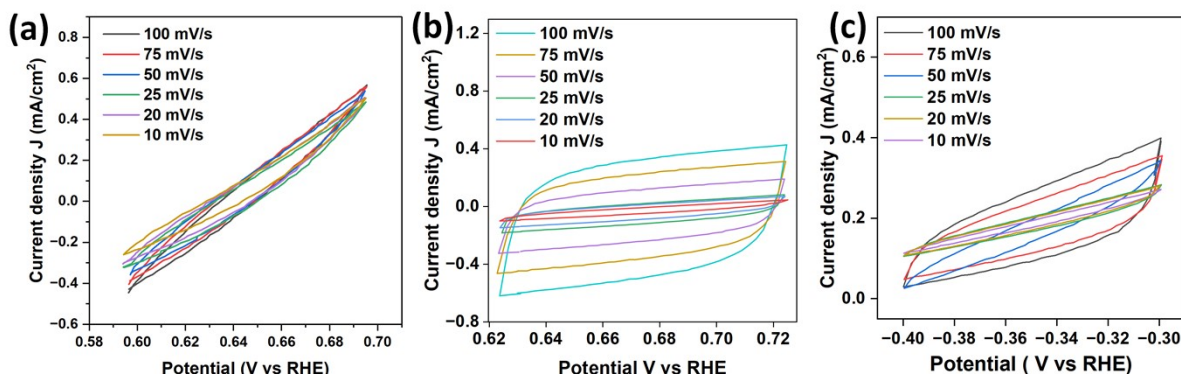

**Fig. 5** CV at different scan rates in 1M KOH of (a) HKUST-1 (b) ZnS QDs (c) ZQH-1.

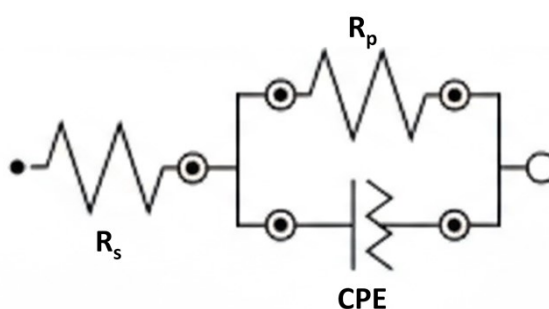

**Fig. 6** Equivalent circuit of ZQH-1 calculated from the Nyquist plot.

An electrical equivalent circuit is drawn with electrical elements in Figure S3. We found from the Nyquist plot that the equivalent circuit is the  $R_s R_{ct}$  CPE circuit, where  $R_s$  = resistance of the solution,  $R_{ct}$  = charge-transfer resistance, and CPE = constant phase element were obtained from the fittings.

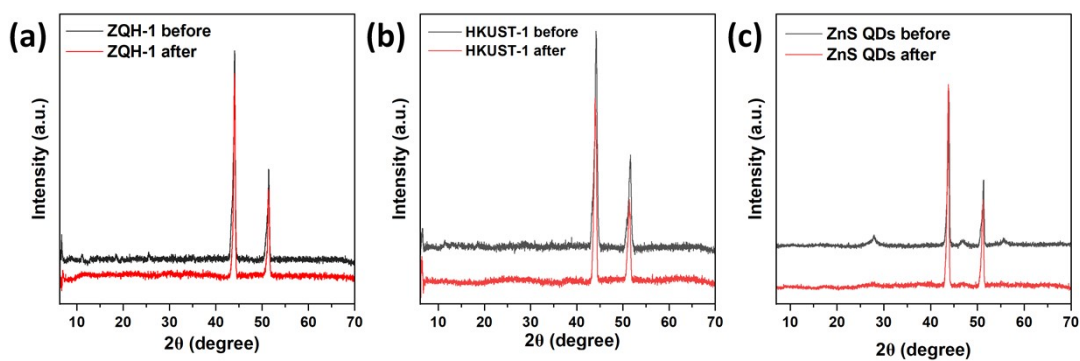

**Fig. 7** PXRD patterns of (a) ZQH-1, (b) HKUST-1, and (c) ZnS QDs before and after post-stability.

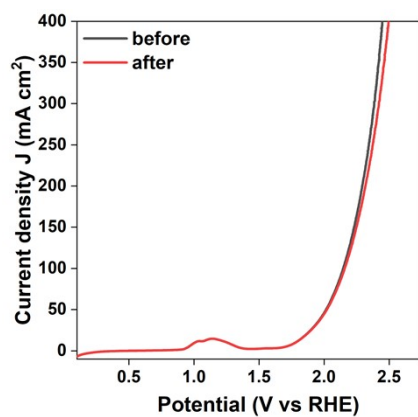

**Fig. 8** LSV curve of ZQH-1 composite before and after 36h of stability.

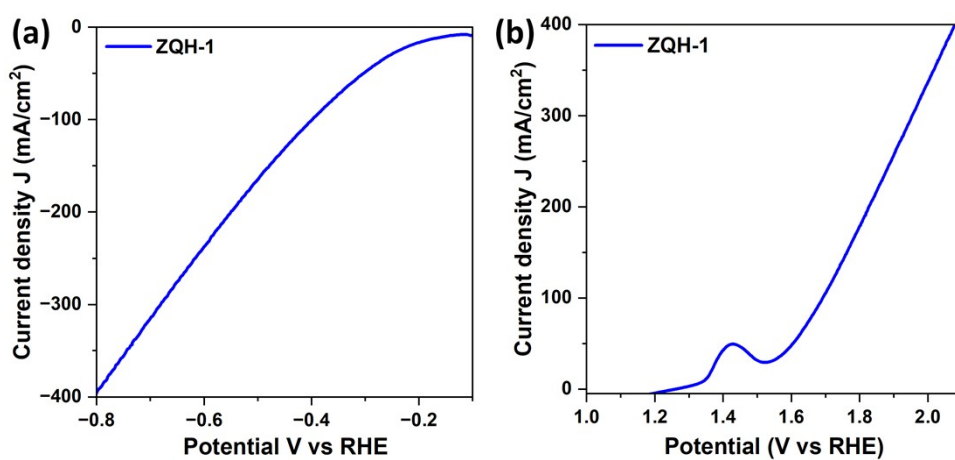

**Fig. 9** LSV curve (non- $iR$ -corrected) of ZQH-1 composite (a) HER and (b) OER.

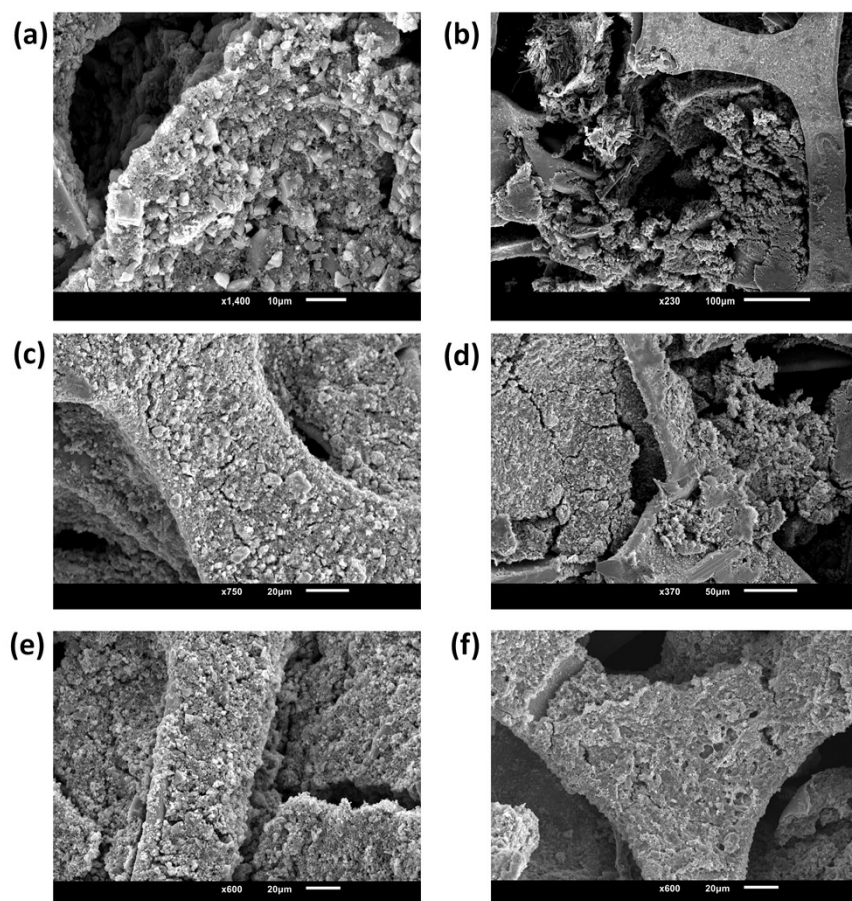

**Fig. 10** SEM images of (a) MOF before (b) MOF after (c) ZnS QDs Before (d) ZnS QDs after (e) ZQH-1 before (f) ZQH-1 after stability.

**Table S2:** Comparison with similar MOF/QDs composites, high-performance non-precious metal catalysts, and commercial precious metal catalysts.

| Sr.no | Material                     | Electrolyte | Overpotential @ 10 mA/cm <sup>2</sup> | Ref. |
|-------|------------------------------|-------------|---------------------------------------|------|
| 1.    | Carbon dots @ Ni-BTC-bpy MOF | 1M KOH      | 320 mV (OER)                          | 1    |
| 2.    | ZnS QDs@Dy-MOF               | 1M KOH      | 228 mV (HER) and 138 mV (OER)         | 2    |
| 3.    | Carbon QD@ Ni-Fe-TDC MOF     | 1M KOH      | 222 mV (OER)                          | 3    |
| 4.    | NiFe-LDH                     | 1M KOH      | 223 mV (OER)                          | 4    |
| 5.    | CuFe composite               | 1M KOH      | 218 mV (HER) and 158 mV (OER)         | 5    |

|            |                                                   |                                     |                                      |                  |
|------------|---------------------------------------------------|-------------------------------------|--------------------------------------|------------------|
| 6.         | Fe-doped Co <sub>3</sub> O <sub>4</sub> nanoflake | 1M KOH                              | 196 mV (HER) and 290 mV (OER)        | 6                |
| 7.         | Comm. Pt/C                                        | 0.5M H <sub>2</sub> SO <sub>4</sub> | 22 mV (HER)                          | 7                |
| 8.         | Ru/Co-N-C catalyst                                | 1M KOH                              | 247 mV (OER)                         | 8                |
| 9.         | IrO <sub>2</sub> -N-rGO                           | 0.5M H <sub>2</sub> SO <sub>4</sub> | 430 mV (OER)                         | 9                |
| 10.        | IrO <sub>2</sub> -RuO <sub>2</sub> /C             | 1M KOH                              | 270 mV (OER)                         | 10               |
| <b>11.</b> | <b>ZQH-1</b>                                      | <b>1M KOH</b>                       | <b>106 mV (OER) and 140 mV (HER)</b> | <b>This work</b> |

**Table S3:** Comparison of HER OER overpotential of reported Cu-MOF and ZnS QDs based electrocatalyst.

| Sr.no      | Material                                                     | Electrolyte                          | Overpotential @ 10 mA/cm <sup>2</sup> | Ref.             |
|------------|--------------------------------------------------------------|--------------------------------------|---------------------------------------|------------------|
| 1.         | Nanowires CuO                                                | 1M KOH                               | 430 mV (OER)                          | 11               |
| 2.         | CF/Cu <sub>3</sub> P                                         | 0.5 M H <sub>2</sub> SO <sub>4</sub> | 170 mV(HER)                           | 12               |
| 3.         | {Cu <sub>2</sub> SiW <sub>12</sub> O <sub>40</sub> }@HKUST-1 | 1M KOH                               | 340 mV (OER)                          | 13               |
| 4.         | Cu <sub>3</sub> P/C-300                                      | 1M KOH                               | 233 mV (OER)                          | 14               |
| 5.         | CuZn-BTC-250                                                 | 1M KOH                               | 253 mV (OER)                          | 15               |
| 6.         | POM@ZnCoS/NF                                                 | 1M KOH                               | 170 mV (OER) and 200 mV (HER)         | 16               |
| 7.         | CuO@UiO-66                                                   | 1M KOH                               | 220 mV (HER)                          | 17               |
| 8.         | CoZn-S/Cu-F                                                  | 1M KOH                               | 170 mV (OER)                          | 18               |
| 9.         | Co-MOF/ZnS                                                   | 1M KOH                               | 434 mV (HER)                          | 19               |
| <b>10.</b> | <b>ZQH-1</b>                                                 | <b>1M KOH</b>                        | <b>106 mV (OER) and 140 mV (HER)</b>  | <b>This work</b> |

### References:

- 1 M. Y. ur Rehman, S. Manzoor, N. Nazar, A. G. Abid, A. M. Qureshi, A. H. Chughtai, K. S. Joya, A. Shah and M. N. Ashiq, *J. Alloys Compd.*, 2021, **856**, 158038.
- 2 M. Sajjad, Z. Ashraf, W. Shoukat, M. Sajid, R. S. Z. Saleem, M. F. Saeed, M. N. Ashiq, F. Verpoort and A. H. Chughtai, *Trans. Tianjin Univ.*, DOI:10.1007/s12209-026-00477-1.

- 3 Y. Zhang, H. Zhou, P. Zhao, K. Yuan, R. Zhou, H. Gao, Y. Qu and Y. Wang, *Fuel*, 2025, **389**, 134609.
- 4 W. Xu, Q. Jian, T. Su, H. Shi, T. Tang, M. Ni and Z. Zhao, *J. Alloys Compd.*, 2026, **1063**, 187766.
- 5 A. I. Inamdar, H. S. Chavan, B. Hou, C. H. Lee, S. U. Lee, S. N. Cha, H. Kim and H. Im, *Small*, DOI:10.1002/sml.201905884.
- 6 Y. Su, B. Liu, Z. Shi, M. Yan and T. Ma, *Molecules*, 2025, **30**, 1–11.
- 7 Y. Tong, H. Ma, F. Xiao, S. Bohm, H. Fu and Y. Luo, *Process Saf. Environ. Prot.*, 2023, **178**, 559–579.
- 8 C. Rong, X. Shen, Y. Wang, L. Thomsen, T. Zhao, Y. Li, X. Lu, R. Amal and C. Zhao, *Adv. Mater.*, DOI:10.1002/adma.202110103.
- 9 P. Joshi, R. Yadav, K. K. H. De Silva, M. Hara, H. Shibuya, Y. Motoyama and M. Yoshimura, *ACS Omega*, 2022, **7**, 29287–29296.
- 10 R. Samanta, P. Panda, R. Mishra and S. Barman, *Energy and Fuels*, 2022, **36**, 1015–1026.
- 11 X. Liu, S. Cui, Z. Sun, Y. Ren, X. Zhang and P. Du, *J. Phys. Chem. C*, 2016, **120**, 831–840.
- 12 J. Tian, Q. Liu, N. Cheng, A. M. Asiri and X. Sun, *Angew. Chemie*, 2014, **126**, 9731–9735.
- 13 H. Liu, L. G. Gong, C. X. Wang, C. M. Wang, K. Yu and B. Bin Zhou, *J. Mater. Chem. A*, 2021, **9**, 13161–13169.
- 14 B. Ren, Q. Yi, F. Yang, Y. Cheng, H. Yu, P. Han, Y. Yang, G. Chen, I. Jeerapan, Z. Li and J. Z. Ou, *Energy and Fuels*, 2022, **36**, 8381–8390.
- 15 N. Aashi, S. Alagar, N. Krishankant, A. Gaur, C. Bera and V. Bagchi, *Sustain. Energy Fuels*, 2023, **7**, 3692–3700.
- 16 J. Gautam, Y. Liu, J. Gu, Z. Ma, J. Zha, B. Dahal, L. N. Zhang, A. N. Chishti, L. Ni, G. Diao and Y. Wei, *Adv. Funct. Mater.*, 2021, **31**, 1–13.
- 17 M. Fiaz, M. Athar, S. Rani, M. Najam-ul-Haq and M. A. Farid, *Mater. Chem. Phys.*, 2020, **239**, 122320.
- 18 H. Pan, Y. Wang, Z. Lu, X. Huang and X. Chen, *New J. Chem.*, 2022, **46**, 11149–11157.
- 19 B. M. Raffah, H. Hassan, M. W. Iqbal and Y. Al-Hadeethi, *Energy and Fuels*, 2024, **38**, 3477–3490.
